# Supplementary material for: The impact of vaccination on gender equity: conceptual framework and human papillomavirus (HPV) vaccine case study
Source: Springer Nature journal article supplement (doi:10.1186/s12939-019-1090-3), 2020-01-14
Supplement: MOESM1 [file 17661524]

**Appendix A. Papillomavirus Rapid Interface for Modelling and Economics (PRIME) tool country-level inputs for India, Tanzania, and the United Kingdom.**

| Country                                                       | India      | Tanzania | United Kingdom |
|---------------------------------------------------------------|------------|----------|----------------|
| Birth cohort size (female)                                    | 11,719,276 | 395,953  | 395,953        |
| Cohort size at vaccination age (female)                       | 11,973,174 | 338,891  | 338,891        |
| Coverage (all doses)                                          | 80%        | 80%      | 80%            |
| Vaccine efficacy vs HPV 16/18                                 | 100%       | 100%     | 100%           |
| Target age group                                              | 12         | 12       | 12             |
| DALYs for cancer diagnosis                                    | 0.08       | 0.08     | 0.08           |
| DALYs for non-terminal cancer sequelae (per year)             | 0.17       | 0.17     | 0.04           |
| DALYs for terminal cancer                                     | 0.78       | 0.78     | 0.78           |
| Discount rate                                                 | 3.0%       | 3.0%     | 3.0%           |
| Proportion of cervical cancer cases that are due to HPV 16/18 | 81.9%      | 74.3%    | 76.6%          |

**Appendix B. Cervical cancer incidence and mortality and all-cause mortality by age for India, Tanzania, and the United Kingdom.**

| Age | India                     |                           |                     | Tanzania                  |                           |                     | United Kingdom            |                           |                     |
|-----|---------------------------|---------------------------|---------------------|---------------------------|---------------------------|---------------------|---------------------------|---------------------------|---------------------|
|     | Cervical cancer incidence | Cervical cancer mortality | All-cause mortality | Cervical cancer incidence | Cervical cancer mortality | All-cause mortality | Cervical cancer incidence | Cervical cancer mortality | All-cause mortality |
| 0   | 0                         | 0                         | 0.0527              | 0                         | 0                         | 0.06974             | 0                         | 0                         | 0.00979125          |
| 1   | 0                         | 0                         | 0.00511             | 0                         | 0                         | 0.01167             | 0                         | 0                         | 0.0003565           |
| 2   | 0                         | 0                         | 0.00511             | 0                         | 0                         | 0.01167             | 0                         | 0                         | 0.0003565           |
| 3   | 0                         | 0                         | 0.00511             | 0                         | 0                         | 0.01167             | 0                         | 0                         | 0.0003565           |
| 4   | 0                         | 0                         | 0.00511             | 0                         | 0                         | 0.01167             | 0                         | 0                         | 0.0003565           |
| 5   | 0                         | 0                         | 0.00143             | 0                         | 0                         | 0.00196             | 0                         | 0                         | 0.000179            |
| 6   | 0                         | 0                         | 0.00143             | 0                         | 0                         | 0.00196             | 0                         | 0                         | 0.000179            |
| 7   | 0                         | 0                         | 0.00143             | 0                         | 0                         | 0.00196             | 0                         | 0                         | 0.000179            |
| 8   | 0                         | 0                         | 0.00143             | 0                         | 0                         | 0.00196             | 0                         | 0                         | 0.000179            |
| 9   | 0                         | 0                         | 0.00143             | 0                         | 0                         | 0.00196             | 0                         | 0                         | 0.000179            |
| 10  | 0                         | 0                         | 0.00102             | 0                         | 0                         | 0.00139             | 0                         | 0                         | 0.00018075          |
| 11  | 0                         | 0                         | 0.00102             | 0                         | 0                         | 0.00139             | 0                         | 0                         | 0.00018075          |
| 12  | 0                         | 0                         | 0.00102             | 0                         | 0                         | 0.00139             | 0                         | 0                         | 0.00018075          |
| 13  | 0                         | 0                         | 0.00102             | 0                         | 0                         | 0.00139             | 0                         | 0                         | 0.00018075          |
| 14  | 0                         | 0                         | 0.00102             | 0                         | 0                         | 0.00139             | 0                         | 0                         | 0.00018075          |
| 15  | 0.000074                  | 0.000025                  | 0.00158             | 0.00014                   | 0.000054                  | 0.00116             | 0.000106                  | 0.00001                   | 0.00030775          |
| 16  | 0.000074                  | 0.000025                  | 0.00158             | 0.00014                   | 0.000054                  | 0.00116             | 0.000106                  | 0.00001                   | 0.00030775          |
| 17  | 0.000074                  | 0.000025                  | 0.00158             | 0.00014                   | 0.000054                  | 0.00116             | 0.000106                  | 0.00001                   | 0.00030775          |
| 18  | 0.000074                  | 0.000025                  | 0.00158             | 0.00014                   | 0.000054                  | 0.00116             | 0.000106                  | 0.00001                   | 0.00030775          |
| 19  | 0.000074                  | 0.000025                  | 0.00158             | 0.00014                   | 0.000054                  | 0.00116             | 0.000106                  | 0.00001                   | 0.00030775          |
| 20  | 0.000074                  | 0.000025                  | 0.00212             | 0.00014                   | 0.000054                  | 0.00292             | 0.000106                  | 0.00001                   | 0.00042025          |
| 21  | 0.000074                  | 0.000025                  | 0.00212             | 0.00014                   | 0.000054                  | 0.00292             | 0.000106                  | 0.00001                   | 0.00042025          |
| 22  | 0.000074                  | 0.000025                  | 0.00212             | 0.00014                   | 0.000054                  | 0.00292             | 0.000106                  | 0.00001                   | 0.00042025          |
| 23  | 0.000074                  | 0.000025                  | 0.00212             | 0.00014                   | 0.000054                  | 0.00292             | 0.000106                  | 0.00001                   | 0.00042025          |
| 24  | 0.000074                  | 0.000025                  | 0.00212             | 0.00014                   | 0.000054                  | 0.00292             | 0.000106                  | 0.00001                   | 0.00042025          |
| 25  | 0.000074                  | 0.000025                  | 0.00198             | 0.00014                   | 0.000054                  | 0.00548             | 0.000106                  | 0.00001                   | 0.00052675          |
| 26  | 0.000074                  | 0.000025                  | 0.00198             | 0.00014                   | 0.000054                  | 0.00548             | 0.000106                  | 0.00001                   | 0.00052675          |
| 27  | 0.000074                  | 0.000025                  | 0.00198             | 0.00014                   | 0.000054                  | 0.00548             | 0.000106                  | 0.00001                   | 0.00052675          |
| 28  | 0.000074                  | 0.000025                  | 0.00198             | 0.00014                   | 0.000054                  | 0.00548             | 0.000106                  | 0.00001                   | 0.00052675          |
| 29  | 0.000074                  | 0.000025                  | 0.00198             | 0.00014                   | 0.000054                  | 0.00548             | 0.000106                  | 0.00001                   | 0.00052675          |
| 30  | 0.000074                  | 0.000025                  | 0.00224             | 0.00014                   | 0.000054                  | 0.00837             | 0.000106                  | 0.00001                   | 0.0007385           |
| 31  | 0.000074                  | 0.000025                  | 0.00224             | 0.00014                   | 0.000054                  | 0.00837             | 0.000106                  | 0.00001                   | 0.0007385           |

14  
15  
16  
17  
18  
19  
20  
21  
22  
23  
24  
25  
26  
27  
28  
29  
30  
31  
32  
33  
34  
35  
36  
37  
38  
39  
40  
41  
42  
43  
44  
45  
46  
47  
48  
49  
50  
51  
52  
53  
54  
55  
56  
57  
58  
59  
60  
61  
62  
63  
64  
65

| Age | India                     |                           |                     | Tanzania                  |                           |                     | United Kingdom            |                           |                     |
|-----|---------------------------|---------------------------|---------------------|---------------------------|---------------------------|---------------------|---------------------------|---------------------------|---------------------|
|     | Cervical cancer incidence | Cervical cancer mortality | All-cause mortality | Cervical cancer incidence | Cervical cancer mortality | All-cause mortality | Cervical cancer incidence | Cervical cancer mortality | All-cause mortality |
| 32  | 0.000074                  | 0.000025                  | 0.00224             | 0.00014                   | 0.000054                  | 0.00837             | 0.000106                  | 0.00001                   | 0.0007385           |
| 33  | 0.000074                  | 0.000025                  | 0.00224             | 0.00014                   | 0.000054                  | 0.00837             | 0.000106                  | 0.00001                   | 0.0007385           |
| 34  | 0.000074                  | 0.000025                  | 0.00224             | 0.00014                   | 0.000054                  | 0.00837             | 0.000106                  | 0.00001                   | 0.0007385           |
| 35  | 0.000074                  | 0.000025                  | 0.00264             | 0.00014                   | 0.000054                  | 0.01052             | 0.000106                  | 0.00001                   | 0.001069            |
| 36  | 0.000074                  | 0.000025                  | 0.00264             | 0.00014                   | 0.000054                  | 0.01052             | 0.000106                  | 0.00001                   | 0.001069            |
| 37  | 0.000074                  | 0.000025                  | 0.00264             | 0.00014                   | 0.000054                  | 0.01052             | 0.000106                  | 0.00001                   | 0.001069            |
| 38  | 0.000074                  | 0.000025                  | 0.00264             | 0.00014                   | 0.000054                  | 0.01052             | 0.000106                  | 0.00001                   | 0.001069            |
| 39  | 0.000074                  | 0.000025                  | 0.00264             | 0.00014                   | 0.000054                  | 0.01052             | 0.000106                  | 0.00001                   | 0.001069            |
| 40  | 0.000419                  | 0.000178                  | 0.00337             | 0.000803                  | 0.000347                  | 0.01058             | 0.000153                  | 0.000026                  | 0.001622            |
| 41  | 0.000419                  | 0.000178                  | 0.00337             | 0.000803                  | 0.000347                  | 0.01058             | 0.000153                  | 0.000026                  | 0.001622            |
| 42  | 0.000419                  | 0.000178                  | 0.00337             | 0.000803                  | 0.000347                  | 0.01058             | 0.000153                  | 0.000026                  | 0.001622            |
| 43  | 0.000419                  | 0.000178                  | 0.00337             | 0.000803                  | 0.000347                  | 0.01058             | 0.000153                  | 0.000026                  | 0.001622            |
| 44  | 0.000419                  | 0.000178                  | 0.00337             | 0.000803                  | 0.000347                  | 0.01058             | 0.000153                  | 0.000026                  | 0.001622            |
| 45  | 0.000604                  | 0.000281                  | 0.00459             | 0.001165                  | 0.000528                  | 0.01023             | 0.00012                   | 0.000029                  | 0.0025685           |
| 46  | 0.000604                  | 0.000281                  | 0.00459             | 0.001165                  | 0.000528                  | 0.01023             | 0.00012                   | 0.000029                  | 0.0025685           |
| 47  | 0.000604                  | 0.000281                  | 0.00459             | 0.001165                  | 0.000528                  | 0.01023             | 0.00012                   | 0.000029                  | 0.0025685           |
| 48  | 0.000604                  | 0.000281                  | 0.00459             | 0.001165                  | 0.000528                  | 0.01023             | 0.00012                   | 0.000029                  | 0.0025685           |
| 49  | 0.000604                  | 0.000281                  | 0.00459             | 0.001165                  | 0.000528                  | 0.01023             | 0.00012                   | 0.000029                  | 0.0025685           |
| 50  | 0.00074                   | 0.000361                  | 0.00674             | 0.001504                  | 0.000736                  | 0.01103             | 0.000086                  | 0.000036                  | 0.004117            |
| 51  | 0.00074                   | 0.000361                  | 0.00674             | 0.001504                  | 0.000736                  | 0.01103             | 0.000086                  | 0.000036                  | 0.004117            |
| 52  | 0.00074                   | 0.000361                  | 0.00674             | 0.001504                  | 0.000736                  | 0.01103             | 0.000086                  | 0.000036                  | 0.004117            |
| 53  | 0.00074                   | 0.000361                  | 0.00674             | 0.001504                  | 0.000736                  | 0.01103             | 0.000086                  | 0.000036                  | 0.004117            |
| 54  | 0.00074                   | 0.000361                  | 0.00674             | 0.001504                  | 0.000736                  | 0.01103             | 0.000086                  | 0.000036                  | 0.004117            |
| 55  | 0.000786                  | 0.000407                  | 0.01164             | 0.001671                  | 0.000952                  | 0.01433             | 0.000076                  | 0.000043                  | 0.0064475           |
| 56  | 0.000786                  | 0.000407                  | 0.01164             | 0.001671                  | 0.000952                  | 0.01433             | 0.000076                  | 0.000043                  | 0.0064475           |
| 57  | 0.000786                  | 0.000407                  | 0.01164             | 0.001671                  | 0.000952                  | 0.01433             | 0.000076                  | 0.000043                  | 0.0064475           |
| 58  | 0.000786                  | 0.000407                  | 0.01164             | 0.001671                  | 0.000952                  | 0.01433             | 0.000076                  | 0.000043                  | 0.0064475           |
| 59  | 0.000786                  | 0.000407                  | 0.01164             | 0.001671                  | 0.000952                  | 0.01433             | 0.000076                  | 0.000043                  | 0.0064475           |
| 60  | 0.000735                  | 0.00045                   | 0.02103             | 0.00182                   | 0.001206                  | 0.01951             | 0.000073                  | 0.00005                   | 0.00973275          |
| 61  | 0.000735                  | 0.00045                   | 0.02103             | 0.00182                   | 0.001206                  | 0.01951             | 0.000073                  | 0.00005                   | 0.00973275          |
| 62  | 0.000735                  | 0.00045                   | 0.02103             | 0.00182                   | 0.001206                  | 0.01951             | 0.000073                  | 0.00005                   | 0.00973275          |
| 63  | 0.000735                  | 0.00045                   | 0.02103             | 0.00182                   | 0.001206                  | 0.01951             | 0.000073                  | 0.00005                   | 0.00973275          |
| 64  | 0.000735                  | 0.00045                   | 0.02103             | 0.00182                   | 0.001206                  | 0.01951             | 0.000073                  | 0.00005                   | 0.00973275          |

14  
15  
16  
17  
18  
19  
20  
21  
22  
23  
24  
25  
26  
27  
28  
29  
30  
31  
32  
33  
34  
35  
36  
37  
38  
39  
40  
41  
42  
43  
44  
45  
46  
47  
48  
49  
50  
51  
52  
53  
54  
55  
56  
57  
58  
59  
60  
61  
62  
63  
64  
65

| Age | India                     |                           |                     | Tanzania                  |                           |                     | United Kingdom            |                           |                     |
|-----|---------------------------|---------------------------|---------------------|---------------------------|---------------------------|---------------------|---------------------------|---------------------------|---------------------|
|     | Cervical cancer incidence | Cervical cancer mortality | All-cause mortality | Cervical cancer incidence | Cervical cancer mortality | All-cause mortality | Cervical cancer incidence | Cervical cancer mortality | All-cause mortality |
| 65  | 0.000634                  | 0.000492                  | 0.03234             | 0.002023                  | 0.001512                  | 0.03168             | 0.000074                  | 0.000057                  | 0.01595025          |
| 66  | 0.000634                  | 0.000492                  | 0.03234             | 0.002023                  | 0.001512                  | 0.03168             | 0.000074                  | 0.000057                  | 0.01595025          |
| 67  | 0.000634                  | 0.000492                  | 0.03234             | 0.002023                  | 0.001512                  | 0.03168             | 0.000074                  | 0.000057                  | 0.01595025          |
| 68  | 0.000634                  | 0.000492                  | 0.03234             | 0.002023                  | 0.001512                  | 0.03168             | 0.000074                  | 0.000057                  | 0.01595025          |
| 69  | 0.000634                  | 0.000492                  | 0.03234             | 0.002023                  | 0.001512                  | 0.03168             | 0.000074                  | 0.000057                  | 0.01595025          |
| 70  | 0.00047                   | 0.000512                  | 0.05607             | 0.002239                  | 0.001864                  | 0.0528              | 0.000077                  | 0.000069                  | 0.0266435           |
| 71  | 0.00047                   | 0.000512                  | 0.05607             | 0.002239                  | 0.001864                  | 0.0528              | 0.000077                  | 0.000069                  | 0.0266435           |
| 72  | 0.00047                   | 0.000512                  | 0.05607             | 0.002239                  | 0.001864                  | 0.0528              | 0.000077                  | 0.000069                  | 0.0266435           |
| 73  | 0.00047                   | 0.000512                  | 0.05607             | 0.002239                  | 0.001864                  | 0.0528              | 0.000077                  | 0.000069                  | 0.0266435           |
| 74  | 0.00047                   | 0.000512                  | 0.05607             | 0.002239                  | 0.001864                  | 0.0528              | 0.000077                  | 0.000069                  | 0.0266435           |
| 75  | 0.000247                  | 0.000513                  | 0.0787              | 0.002494                  | 0.002267                  | 0.08688             | 0.000093                  | 0.000104                  | 0.04687725          |
| 76  | 0.000247                  | 0.000513                  | 0.0787              | 0.002494                  | 0.002267                  | 0.08688             | 0.000093                  | 0.000104                  | 0.04687725          |
| 77  | 0.000247                  | 0.000513                  | 0.0787              | 0.002494                  | 0.002267                  | 0.08688             | 0.000093                  | 0.000104                  | 0.04687725          |
| 78  | 0.000247                  | 0.000513                  | 0.0787              | 0.002494                  | 0.002267                  | 0.08688             | 0.000093                  | 0.000104                  | 0.04687725          |
| 79  | 0.000247                  | 0.000513                  | 0.0787              | 0.002494                  | 0.002267                  | 0.08688             | 0.000093                  | 0.000104                  | 0.04687725          |
| 80  | 0.000247                  | 0.000513                  | 0.12099             | 0.002494                  | 0.002267                  | 0.13693             | 0.000093                  | 0.000104                  | 0.08301425          |
| 81  | 0.000247                  | 0.000513                  | 0.12099             | 0.002494                  | 0.002267                  | 0.13693             | 0.000093                  | 0.000104                  | 0.08301425          |
| 82  | 0.000247                  | 0.000513                  | 0.12099             | 0.002494                  | 0.002267                  | 0.13693             | 0.000093                  | 0.000104                  | 0.08301425          |
| 83  | 0.000247                  | 0.000513                  | 0.12099             | 0.002494                  | 0.002267                  | 0.13693             | 0.000093                  | 0.000104                  | 0.08301425          |
| 84  | 0.000247                  | 0.000513                  | 0.12099             | 0.002494                  | 0.002267                  | 0.13693             | 0.000093                  | 0.000104                  | 0.08301425          |
| 85  | 0.000247                  | 0.000513                  | 0.18182             | 0.002494                  | 0.002267                  | 0.20789             | 0.000093                  | 0.000104                  | 0.14132575          |
| 86  | 0.000247                  | 0.000513                  | 0.18182             | 0.002494                  | 0.002267                  | 0.20789             | 0.000093                  | 0.000104                  | 0.14132575          |
| 87  | 0.000247                  | 0.000513                  | 0.18182             | 0.002494                  | 0.002267                  | 0.20789             | 0.000093                  | 0.000104                  | 0.14132575          |
| 88  | 0.000247                  | 0.000513                  | 0.18182             | 0.002494                  | 0.002267                  | 0.20789             | 0.000093                  | 0.000104                  | 0.14132575          |
| 89  | 0.000247                  | 0.000513                  | 0.18182             | 0.002494                  | 0.002267                  | 0.20789             | 0.000093                  | 0.000104                  | 0.14132575          |
| 90  | 0.000247                  | 0.000513                  | 0.2671              | 0.002494                  | 0.002267                  | 0.30365             | 0.000093                  | 0.000104                  | 0.22859225          |
| 91  | 0.000247                  | 0.000513                  | 0.2671              | 0.002494                  | 0.002267                  | 0.30365             | 0.000093                  | 0.000104                  | 0.22859225          |
| 92  | 0.000247                  | 0.000513                  | 0.2671              | 0.002494                  | 0.002267                  | 0.30365             | 0.000093                  | 0.000104                  | 0.22859225          |
| 93  | 0.000247                  | 0.000513                  | 0.2671              | 0.002494                  | 0.002267                  | 0.30365             | 0.000093                  | 0.000104                  | 0.22859225          |
| 94  | 0.000247                  | 0.000513                  | 0.2671              | 0.002494                  | 0.002267                  | 0.30365             | 0.000093                  | 0.000104                  | 0.22859225          |
| 95  | 0.000247                  | 0.000513                  | 0.38355             | 0.002494                  | 0.002267                  | 0.42633             | 0.000093                  | 0.000104                  | 0.3492875           |
| 96  | 0.000247                  | 0.000513                  | 0.38355             | 0.002494                  | 0.002267                  | 0.42633             | 0.000093                  | 0.000104                  | 0.3492875           |
| 97  | 0.000247                  | 0.000513                  | 0.38355             | 0.002494                  | 0.002267                  | 0.42633             | 0.000093                  | 0.000104                  | 0.3492875           |

14  
15  
16  
17  
18  
19  
20  
21  
22  
23  
24  
25  
26  
27  
28  
29  
30  
31  
32  
33  
34  
35  
36  
37  
38  
39  
40  
41  
42  
43  
44  
45  
46  
47  
48  
49  
50  
51  
52  
53  
54  
55  
56  
57  
58  
59  
60  
61  
62  
63  
64  
65

| Age        | India                     |                           |                     | Tanzania                  |                           |                     | United Kingdom            |                           |                     |
|------------|---------------------------|---------------------------|---------------------|---------------------------|---------------------------|---------------------|---------------------------|---------------------------|---------------------|
|            | Cervical cancer incidence | Cervical cancer mortality | All-cause mortality | Cervical cancer incidence | Cervical cancer mortality | All-cause mortality | Cervical cancer incidence | Cervical cancer mortality | All-cause mortality |
| <b>98</b>  | 0.000247                  | 0.000513                  | 0.38355             | 0.002494                  | 0.002267                  | 0.42633             | 0.000093                  | 0.000104                  | 0.3492875           |
| <b>99</b>  | 0.000247                  | 0.000513                  | 0.38355             | 0.002494                  | 0.002267                  | 0.42633             | 0.000093                  | 0.000104                  | 0.3492875           |
| <b>100</b> | 0.000247                  | 0.000513                  | 1                   | 0.002494                  | 0.002267                  | 1                   | 0.000093                  | 0.000104                  | 1                   |

1  
2  
3  
4 **Appendix C. List of linkages between gender equity and health.**  
5

6  
7 Maternal health →

- 8 • Women’s human capital (Albanesi & Olivetti, 2014) (40)
- 9 • Labor force participation (Albanesi & Olivetti, 2016; Bloom et al., 2009; Bloom et al.,  
10 2016) (27, 41, 42)
- 11 • Fertility (Albanesi & Olivetti, 2016; Bloom et al., 2009; Bloom et al., 2016) (27, 41, 42)
- 12 • Economic productivity (Onarheim et al., 2016) (48)

13  
14 Life expectancy →

- 15 • Educational attainment (Jayachandran & Lleras-Muney, 2009) (45)

16  
17 Child health and mortality →

- 18 • Maternal gender equity (Brinda et al., 2015) (43)
- 19 • Educational attainment and/or performance (Gakidou et al., 2010; Jukes, 2005) (44, 46)

20  
21 Gender equity →

- 22 • Healthy life expectancy at birth (Kim & Kim, 2014) (38)
- 23 • Health of women and girls (Payne, 2015) (49)

24  
25  
26 *Note:* King et al., 2018 was a review article covering multiple linkages (47).  
27  
28  
29  
30  
31  
32  
33  
34  
35  
36  
37  
38  
39  
40  
41  
42  
43  
44  
45  
46  
47  
48  
49  
50  
51  
52  
53  
54  
55  
56  
57  
58  
59  
60  
61  
62  
63  
64  
65
